# Supplementary material for: Stereoselective synthesis of freelingyne and related γ-alkylidenebutenolides via vinylogous Mukaiyama aldol additions
Source: Royal Society of Chemistry journal article supplement (doi:10.1039/b002903n), 2000-01-01
Supplement: b002903n.doc [file b002903n.doc]

**Stereoselective Synthesis of Freelingyne and Related -Alkylidene­butenolides via Vinylogous Mukaiyama Aldol Additions**

Frank von der Ohe† and Reinhard Brückner†‡*

Institut für Organische Chemie der Georg-August-Universität,

Tammannstr. 2, D-37077 Göttingen, Germany

†New address: Institut für Organische Chemie und Biochemie der Albert-Ludwigs-Universität,
Albertstr. 21, D-79104 Freiburg, Germany
Fax: Int.+49-761-2036100; *E*-mail: reinhard.brueckner@organik.chemie.uni-freiburg.de

# Select detailed NMR data

1H NMR [CHCl3 (7.26 ppm) as internal standard in CDCl3 or C6HD5 (7.16 ppm) as internal standard in C6D6 or DMSO-d5 (2.49 ppm) as internal standard in DMSO-d6] and 13C NMR [CDCl3 (77.00 ppm) as internal standard in CDCl3 or C6D6 (128.00 ppm) as internal standard in C6D6 or DMSO-d6 (39.70 ppm) as internal standard in DMSO-d6]: Varian VXR 200, Bruker AMX 300, Varian Unity*Inova* 500 and Varian Unity 300; 1H NMR spectra: integrals in accord with assignments, coupling constants in Hz; APT 13C NMR spectra: peak orientation in accord with asssignments. Designation of 2D NMR spectra: "H,H COSY spectrum" for (ordinary) H,H COSY spectrum, "long-range H,H COSY spectrum" for delayed H,H COSY spectrum, "C,H COSY spectrum" for HMQC spectrum, "long-range C,H COSY spectrum" for HMBC spectrum. The assignments of 1H- and 13C NMR resonances refer to the IUPAC nomenclature; primed numbers belong to the side-chain(s in the order of their appearance IUPAC in the name).

**5***Z*-**5-[***E*-**5-(3-Furanyl)-2-methyl-2-penten-4-yn-1-ylidene]-3-methyl-2(5*H*)-furanone** (**"freelingyne",** *Z*-**9**): {1H} decoupled 13C NMR (50 MHz, CDCl3):  = 10.65 (3-CH3), 18.23 (2´-CH3), 89.87 (C-5´), 90.58 (C-4´), 107.79 (C-3´´), 112.31 (C-4´´), 114.38 (C-1´), 114.99 (C-3´), 128.84 (C-3), 138.90 (C-4), 142.99 (C-5´´), 143.86 (C-2´), 145.44 (C-2´´), 147.34 (C-5), 170.82 (C-2); assignment based on cross-peak in the 300 MHz C,H COSY spectrum with H = 2.04 (3-Me); assignment based on cross-peak in the 300 MHz C,H COSY spectrum with H = 2.35 (2´-Me); assignment based on a very weak cross-peak in the 300 MHz long-range C,H COSY spectrum with H = 5.90 (3´-H); assignment based on cross-peak in the 300 MHz long-range C,H COSY spectrum with H = 5.90 (3´-H); assignment based on cross-peak in the 300 MHz long-range C,H COSY spectrum with H = 6.47 (4´´-H), H = 7.40 (5´´-H) and H = 7.66 (2´´-H); assignment based on cross-peak in the 300 MHz C,H COSY spectrum with H = 6.47 (4´´-H); assignment based on cross-peak in the 300 MHz C,H COSY spectrum with H = 5.64 (1´-H); assignment based on cross-peak in the 300 MHz C,H COSY spectrum with H = 5.90 (3´-H); assignment based on cross-peak in the 300 MHz long-range C,H COSY spectrum with H = 7.03 (4-H); assignment based on cross-peak in the 300 MHz C,H COSY spectrum with H = 7.03 (4-H); assignment based on cross-peak in the 300 MHz C,H COSY spectrum with H = 7.40 (5´´-H); assignment based on cross-peak in the 300 MHz long-range C,H COSY spectrum with H = 5.90 (3´-H); assignment based on cross-peak in the 300 MHz C,H COSY spectrum with H = 7.66 (2´´-H); assignment based on cross-peak in the 300 MHz long-range C,H COSY spectrum with H = 5. 64 (1´-H) and H = 7.03 (4-H).

**5***E*-**5-[***E*-**5-(3-Furanyl)-2-methyl-2-penten-4-yn-1-ylidene]-3-methyl-2(5*H*)-furanone** (**"***E*-**freelingyne**"**,** *E*-**9**): 13C NMR (APT, 50 MHz, CDCl3):  = 11.04 (3-CH3), 18.19 (2´-CH3), 89.54 (C-5´), 90.77 (C-4´), 107.67 (C-3´´), 112.28 (C-4´´), 115.97 (C-3´), 116.63 (C-1´), 131.49 (C-3), 134.40 (C-4), 142.38 (C-2´), 143.07 (C-5´´), 145.53 (C-2´´), 148.97 (C-5), 169.80 (C-2); assignment based on cross-peak in the 300 MHz C,H COSY spectrum with H = 2.07 (3-Me); assignment based on cross-peak in the 300 MHz C,H COSY spectrum with H = 2.24 (2´-Me); assignment based on a very weak cross-peak in the 300 MHz long-range C,H COSY spectrum with H = 5.89 (3´-H); assignment based on cross-peak in the 300 MHz long-range C,H COSY spectrum with H = 5.89 (3´-H); assignment based on cross-peak in the 300 MHz long-range C,H COSY spectrum with H = 6.48 (weak; 4´´-H), H = 7.41 (5´´-H) and H = 7.66 (2´´-H); assignment based on cross-peak in the 300 MHz C,H COSY spectrum with H = 6.48 (4´´-H); assignment based on cross-peak in the 300 MHz C,H COSY spectrum with H = 5.89 (3´-H); assignment based on cross-peak in the 300 MHz C,H COSY spectrum with H = 6.31 (1´-H); assignment because of a very weak cross-peak in the 300 MHz long-range C,H COSY spectrum with H = 7.50 (4-H); assignment based on cross-peak in the 300 MHz C,H COSY spectrum with H = 7.50 (4-H); assignment based on cross-peak in the 300 MHz long-range C,H COSY spectrum with H = 5.89 (3´-H); assignment based on cross-peak in the 300 MHz C,H COSY spectrum with H = 7.41 (5´´-H); assignment based on cross-peak in the 300 MHz C,H COSY spectrum with H = 7.66 (2´´-H); assignment based on cross-peak in the 300 MHz long-range C,H COSY spectrum with H = 6.31 (1´-H) and H = 7.50 (4-H); assignment based on cross-peak in the 300 MHz long-range C,H COSY spectrum with H = 7.50 (4-H).

**5***Z*-**5-[***E*-**5-(3-Furanyl)-2-methyl-2-penten-4-yn-1-ylidene]-4-methyl-2(5*H*)-furanone** ("**isofreelingyne",** *Z*-**11**): 1H NMR (300 MHz, C6D6):  = 1.21 (d, 4*J*4-Me,3´ = 1.5, 4-CH3), 2.46 (d, 4*J*2´-Me,3´´ = 1.1, 2´-CH3), 5.14 (s, 1´-H), 5.29 (br. s, 3-H), 5.82 (br. s, 3´-H), 6.20 (dd, *J*4´´,5´´ = 1.9, 4*J*4´´,2´´ = 0.8, 4´´-H), 6.83 (dd, *J*5´´,4´´ = 4*J*5´´,2´´ = 1.7, 5´´-H), 7.28 (br. s, 2´´-H); assignment based on cross-peak in the 300 MHz long-range H,H COSY spectrum with H = 5.29 (3-H); assignment based on cross-peak in the 300 MHz long-range H,H COSY spectrum with H = 5.82 (3´-H); assignment – and differentiation from the 3-H singlet  based on cross-peak with H = 5.14 (1´-H) in 300 MHz NOESY spectrum; the furan protons were assigned on grounds of their coupling patterns and analogy with the corresponding assignments in compound *Z*-**9**. 13C NMR (APT spectrum plus {1H} decoupled 13C-NMR spectrum, both 125 MHz, C6D6 as internal standard in C6D6):  = 11.00 (4-CH3), 18.34 (2´-CH3), 90.43 (C-5´), 91.23 (C-4´), 108.41 (C-3´´), 111.20 (C-1´), 112.54 (C-4´´), 115.38 (C-3´), 116.07 (C-3), 143.27 (C-5´´), 144.12 (C-2´), 145.85 (C-2´´), 149.75 (C-4), 154.71 (C-5), 168.08 (C-2); assignment analogous to *Z*-**9** where  (2´-CH3) = 18.23 (albeit in CDCl3); C-4´ and C-5´ were differentiated by a cross-peak in the 300 MHz long-range C,H COSY spectrum of C-4´ with H = 5.82 (3´-H); C-1´, C-4´´, C-3´ and C-3 were distinguished from each other based on cross-peaks in the 300 MHz long-range C,H COSY spectrum of C-1´ with H = 5.82 (3´-H), of C-4´´ with H = 7.28 (2´´-H), of C-3´ with H = 2.46 (2´-Me) and of C-3 with H = 1.21 (4-Me); C-5´´ was distinguished from C-2´´ because the former only shows a cross-peak in the 300 MHz long-range C,H COSY spectrum with H = 7.28 (2´´-H); C-2´, C-4 and C-5 were distinguished from each other based on cross-peaks in the 300 MHz long-range C,H COSY spectrum of C-2´ with H = 5.82 (3´-H), of C-4 both with H = 5.14 (1´-H) and H = 5.29 (3-H; this proton is one center closer to the coupling C-atom) and of C-5 both with H = 5.29 (3-H; very low intensity) and H = 5.14 (1´-H; this proton is one center closer to the coupling C-atom).

**5***Z***-5-[(5-Methyl-2-thiophenyl)methylene]-2(5*H*)-furanone** (*Z*-**28**): 13C NMR (APT spectrum at 75 MHz, CDCl3):  = 15.67 (5´´-Me), 108.10 (C-1´); 117.24 (C-3), 131.87 (C-3´´), 134.08 (C-2´´), 143.65 (C-4), 145.85 (C-5),, 146.69 (C-5´´),, 169.83 (C-2); each of these assignments is based on the respective cross-peak in the 300 MHz short-range C,H COSY spectrum with the corresponding proton signal (which had been assigned independently); C-5 and C-2´´ were distinguished by a 300 MHz long-range C,H COSY spectrum where C = 145.85 correlates with H = 7.44 (4-H) and with H = 6.23 (1´-H) while C = 134.08 correlates with H = 7.18 (3´´-H); C-5 and C-5´´ were distinguished by a 300 MHz long-range C,H COSY spectrum where C = 145.85 does not correlate with H = 2.53 (5´´-H) while while C = 146.69 does.

*lk-***5-(***E*-**1-Hydroxy-3-iodo-2-methyl-2-propenyl)-3-methyl-2(5*H*)-furanone** (*lk*-**29**): 1H NMR (300 MHz, DMSO-d6, DMSO-d5 as internal standard):  = 1.79 (mc, 2´-CH3), 4.26 (br. dd, *J*1´,OH = J1´,5 = 4.7, 1´-H), 5.05 (dqd, *J*5,1´ = 4.3, 5*J*5,3-Me  *J*5,4  1.9, 5-H), 5.61 (d, *J*OH,1´ = 5.3, OH), 6.39 (hardly resolved qd, 4*J*3´,2´-Me  4*J*3´,1´ 1.5, 3´-H), 7.19 (qd, 4*J*4,3-Me  *J*4,5  1.0, 4-H); distinguishable by a 300 MHz long-range H,H COSY spectrum where 3´-H correlates *inter alia* with  = 4.26 (1´-H) and not with  = 5.05 (5-H) while the opposite is true for 4-H.– 13C NMR (75 MHz, DMSO-d6 as internal standard in DMSO-d6):  = 10.91 and 21.30 (3-CH3, 2´-CH3), 74.84 (C-1´), 81.44 (C-3´), 82.81 (C-5), 129.71 (C-3), 147.65 (C-2´), 148.34 (C-4), 174.39 (C-2); assignment based on cross-peak with H = 4.26 (1´-H) in the 300 MHz short-range C,H COSY spectrum; assignment based on cross-peak with H = 6.39 (3-H´) in the short-range 300 MHz C,H COSY spectrum; assignment based on cross-peak with H = 5.05 (5-H) in the 300 MHz short-range C,H COSY spectrum; assignment based on cross-peak inter alia with H = 7.19 (4-H) in the 300 MHz long-range C,H COSY spectrum; assignment based on cross-peaks with H = 4.26 (1´-H), H = 5.61 (OH) and H = 6.39 (3´-H) in the 300 MHz long-range C,H COSY spectrum; assignment based on cross-peak with H = 7.19 (4-H) in the 300 MHz short-range C,H COSY spectrum..

*ul-***5-(***E*-**1-Hydroxy-3-iodo-2-methyl-2-propenyl)-3-methyl-2(5*H*)-furanone** (*ul*-**29**): 1H NMR (300 MHz, DMSO-d5 as internal standard in DMSO-d6):  = 1.80 (dd, 4*J*3-Me,4´ = 5*J*3-Me,5 = 1.9, 3-Me), 1.81 (d, 4*J*2´-Me,3´ = 1.1, 2´-Me), 4.16 (br. dd, *J*1´,OH  *J*1´,5  5.1, 1´-H), 4.99 (dqd, *J*5,1´= 6.1, 5*J*5,3-Me  *J*5,4  1.9, 5-H), 5.76 (d, *J*OH,1´ = 4.9, OH), 6.43 (qd, 4*J*3´,2´-Me  4*J*3´,1´  1.6, 3´-H), 7.29 (qd, 4*J*4.3-Me  *J*4,5  1.1, 4-H); distinguishable by a 300 MHz long-range H,H COSY spectrum where 3´-H correlates *inter alia* with  = 4.16 (1´-H) and not with  = 4.99 (5-H) while the opposite is true for 4-H. 13C NMR (APT spectrum at 50 MHz, DMSO-d6 as internal standard in DMSO-d6):  = 10.81 (3-Me), 20.80 (2´-Me), 75.38 (C-1´), 81.73 (C-5), 81.88 (C-3´), 129.78 (C-3), 147.48 (C-2´), 148.32 (C-4), 173.99 (C-2); distinguishable by a 300 MHz short-range C,H COSY spectrum where C = 10.81 correlates with the high-field moiety of H = 1.80-1.81 and C = 20.80 correlates with the low-field moiety of H = 1.80-1.81; assignment based on cross-peak with H = 4.16 (1´-H) in the 300 MHz short-range C,H COSY spectrum; assignment based on cross-peak with H = 4.99 (5-H) in the 300 MHz C,H COSY spectrum; assignment based on cross-peak with H = 6.43 (3´-H) in the 300 MHz short-range C,H COSY spectrum; assignment of C-3 (high-field) vs. C-2´ (low-field) performed because of shift-analogy to *lk*-**29** (C-3 = 129.71, C-2´ = 147.65); assignment based on cross-peak with H = 7.29 (4-H) in the 300 MHz short-range C,H COSY spectrum.
